# Supplementary material for: Phytopathogenic Curtobacterium flaccumfaciens Strains Circulating on Leguminous Plants, Alternative Hosts and Weeds in Russia
Source: MDPI journal article supplement (doi:10.3390/plants13050667), 2024-02-28
Supplement: s1 [file s1]

## Supplementary Material

# Phytopathogenic *Curtobacterium flaccumfaciens* strains circulating on leguminous plants, alternative hosts and weeds in Russia

**Table S1.** Bacteriological characteristics of strains isolated in this study. Y – yellow, LY – light yellow, «+» – positive, «-» – negative, «+/-» – weak positive.

| No                                        | Strain | Curtobacterium sp. PCR | Cff PCR assay | Colour on NBY | Gram stain | Catalase | Cytochrom-c-oxidase | Urease | Indole | Gelatin hydrolysis | Casein hydrolysis | Glucose o/f test - O | Glucose o/f test - F | Acid from mannose | Acid from maltose | Acid from inositol | Acid from inulin | Acid from erythritol |
|-------------------------------------------|--------|------------------------|---------------|---------------|------------|----------|---------------------|--------|--------|--------------------|-------------------|----------------------|----------------------|-------------------|-------------------|--------------------|------------------|----------------------|
| EPPO standard                             |        | +                      | +             | Y             | +          | +        | -                   | -      | -      | +                  | +                 | +                    | -                    | +                 | +                 | +                  | -                | -                    |
| Pathogenic strains from cultivated plants |        |                        |               |               |            |          |                     |        |        |                    |                   |                      |                      |                   |                   |                    |                  |                      |
| 1                                         | C034   | +                      | +             | Y             | +          | +        | -                   | -      | -      | +                  | +                 | +                    | -                    | +                 | +                 | +/-                | +/-              | -                    |
| 2                                         | C035   | +                      | +             | Y             | +          | +        | -                   | -      | -      | +                  | +                 | +                    | -                    | +                 | +                 | +/-                | +/-              | -                    |
| 3                                         | C036   | +                      | +             | Y             | +          | +        | -                   | -      | -      | +                  | +                 | +                    | -                    | +                 | +                 | +/-                | +/-              | -                    |
| 4                                         | C037   | +                      | +             | Y             | +          | +        | -                   | -      | -      | +                  | +                 | +                    | -                    | +                 | +                 | +/-                | +/-              | -                    |
| 5                                         | C038   | +                      | +             | Y             | +          | +        | -                   | -      | -      | +                  | +                 | +                    | -                    | +                 | +                 | +/-                | +/-              | -                    |
| 6                                         | C039   | +                      | +             | Y             | +          | +        | -                   | -      | -      | +                  | +                 | +                    | -                    | +                 | +                 | +/-                | +/-              | -                    |
| 7                                         | C040   | +                      | +             | Y             | +          | +        | -                   | -      | -      | +                  | +                 | +                    | -                    | +                 | +                 | +/-                | +/-              | -                    |
| 8                                         | C043   | +                      | +             | Y             | +          | +        | -                   | -      | -      | +/-                | +                 | +                    | -                    | +                 | +                 | +/-                | +/-              | -                    |
| 9                                         | C086   | +                      | +             | LY            | +          | +        | -                   | -      | -      | +                  | +                 | +                    | -                    | +                 | +                 | +/-                | +                | -                    |
| 10                                        | C087   | +                      | +             | LY            | +          | +        | -                   | -      | -      | +                  | +                 | +                    | -                    | +                 | +                 | +/-                | +/-              | -                    |
| 11                                        | C088   | +                      | +             | LY            | +          | +        | -                   | -      | -      | +                  | +                 | +                    | -                    | +                 | +                 | +/-                | +/-              | -                    |
| 12                                        | C089   | +                      | +             | LY            | +          | +        | -                   | -      | -      | +                  | +                 | +                    | -                    | +                 | +                 | +                  | +/-              | -                    |
| 13                                        | C090   | +                      | +             | LY            | +          | +        | -                   | -      | -      | +                  | +                 | +                    | -                    | +                 | +                 | +                  | +/-              | -                    |
| 14                                        | C091   | +                      | +             | LY            | +          | +        | -                   | -      | -      | +                  | +                 | +                    | -                    | +                 | +                 | +                  | +/-              | -                    |
| 15                                        | C137   | +                      | +             | LY            | +          | +        | -                   | -      | -      | +/-                | +                 | +                    | -                    | +                 | -                 | +                  | +                | -                    |
| 16                                        | C138   | +                      | +             | LY            | +          | +        | -                   | -      | -      | +/-                | +                 | +                    | -                    | +                 | -                 | +                  | +/-              | -                    |
| 17                                        | C139   | +                      | +             | LY            | +          | +        | -                   | -      | -      | +                  | +                 | +                    | -                    | +                 | -                 | +                  | +/-              | -                    |
| 18                                        | C142   | +                      | +             | LY            | +          | +        | -                   | -      | -      | +                  | +                 | +                    | -                    | +                 | -                 | +                  | +/-              | -                    |
| 19                                        | C144   | +                      | +             | LY            | +          | +        | -                   | -      | -      | +                  | +                 | +                    | -                    | +                 | -                 | +                  | +/-              | -                    |
| Pathogenic strains from wild plants       |        |                        |               |               |            |          |                     |        |        |                    |                   |                      |                      |                   |                   |                    |                  |                      |
| 20                                        | C108   | +                      | +             | LY            | +          | +        | -                   | -      | -      | +/-                | +                 | +                    | -                    | +                 | +                 | +                  | -                | -                    |

| No                | Strain | Curtobacterium sp. PCR | Cff PCR assay | Colour on NBY | Gram stain | Catalase | Cytochrom-c-oxidase | Urease | Indole | Gelatin hydrolysis | Casein hydrolysis | Glucose o/f test - O | Glucose o/f test - F | Acid from mannose | Acid from maltose | Acid from inositol | Acid from inulin | Acid from erythriol |
|-------------------|--------|------------------------|---------------|---------------|------------|----------|---------------------|--------|--------|--------------------|-------------------|----------------------|----------------------|-------------------|-------------------|--------------------|------------------|---------------------|
| 21                | C109   | +                      | +             | LY            | +          | +        | -                   | -      | -      | +                  | +                 | +                    | -                    | +                 | +                 | +                  | -                | -                   |
| 22                | C110   | +                      | +             | LY            | +          | +        | -                   | -      | -      | +/-                | +                 | +                    | -                    | +                 | +                 | +/-                | +/-              | -                   |
| 23                | C112   | +                      | +             | LY            | +          | +        | -                   | -      | -      | +/-                | +                 | +                    | -                    | +                 | +/-               | +                  | +/-              | -                   |
| 24                | C113   | +                      | +             | LY            | +          | +        | -                   | -      | -      | +/-                | +                 | +                    | -                    | +                 | +/-               | +                  | +/-              | -                   |
| 25                | C114   | +                      | +             | LY            | +          | +        | -                   | -      | -      | +                  | +                 | +                    | -                    | +                 | +                 | +                  | +/-              | -                   |
| 26                | C115   | +                      | +             | LY            | +          | +        | -                   | -      | -      | +                  | +                 | +                    | -                    | +                 | +                 | +                  | +/-              | -                   |
| 27                | C116   | +                      | +             | LY            | +          | +        | -                   | -      | -      | +                  | +                 | +                    | -                    | +                 | +                 | +                  | +/-              | -                   |
| 28                | C117   | +                      | +             | LY            | +          | +        | -                   | -      | -      | +                  | +                 | +                    | -                    | +                 | +                 | +                  | +/-              | -                   |
| 29                | C118   | +                      | +             | LY            | +          | +        | -                   | -      | -      | +                  | +                 | +                    | -                    | +                 | +                 | +                  | +/-              | -                   |
| 30                | C122   | +                      | +             | LY            | +          | +        | -                   | -      | -      | +                  | +                 | +                    | -                    | +                 | +                 | +                  | +/-              | -                   |
| 31                | C123   | +                      | +             | Y             | +          | +        | -                   | -      | -      | +/-                | +                 | +                    | -                    | +                 | +/-               | +                  | +                | -                   |
| 32                | C129   | +                      | +             | Y             | +          | +        | -                   | -      | -      | +                  | +                 | +                    | -                    | +                 | +                 | +                  | +                | -                   |
| 33                | C130   | +                      | +             | Y             | +          | +        | -                   | -      | -      | +                  | +                 | +                    | -                    | +                 | +                 | +                  | +/-              | -                   |
| Reference strains |        |                        |               |               |            |          |                     |        |        |                    |                   |                      |                      |                   |                   |                    |                  |                     |
| 34                | C001   | +                      | +             | Y             | +          | +        | -                   | -      | -      | +                  | +                 | +                    | -                    | +                 | +                 | +                  | +/-              | -                   |
| 35                | C106   | +                      | +             | Y             | +          | +        | -                   | -      | -      | +                  | +                 | +                    | -                    | +                 | +                 | +/-                | +                | -                   |
| 36                | C119   | +                      | +             | LY            | +          | +        | -                   | -      | -      | +/-                | +                 | +                    | -                    | +                 | +                 | +                  | +/-              | -                   |
| 37                | C120   | +                      | +             | LY            | +          | +        | -                   | -      | -      | +/-                | +                 | +                    | -                    | +                 | +                 | +                  | +/-              | -                   |
| 38                | C121   | +                      | +             | LY            | +          | +        | -                   | -      | -      | +                  | +                 | +                    | -                    | +                 | +                 | +                  | +/-              | -                   |
| 39                | C133   | +                      | +             | LY            | +          | +        | -                   | -      | -      | +                  | +                 | +                    | -                    | +                 | -                 | +                  | +                | -                   |
