# Supplementary material for: Phytopathogenic Curtobacterium flaccumfaciens Strains Circulating on Leguminous Plants, Alternative Hosts and Weeds in Russia
Source: MDPI journal article supplement (doi:10.3390/plants13050667), 2024-02-28
Supplement: s1 [file s1]

## Supplementary Material

# Phytopathogenic *Curtobacterium flaccumfaciens* strains circulating on leguminous plants, alternative hosts and weeds in Russia

**Table S2.** Distribution of statistical groups according to the Duncan criterion according to the values of the affected area of the leaf after the inoculation of soybeans and common beans with *Cf* strains. Values within columns marked by different letters indicate a significant difference, using Duncan's criterion,  $p=0.05$ .

| №  | Strain name | Average values<br>of the leaf<br>lesion area           | Groups by<br>criterion<br>Duncan | Strain name | Average<br>values of the<br>leaf lesion<br>area                           | Groups by<br>criterion<br>Duncan |
|----|-------------|--------------------------------------------------------|----------------------------------|-------------|---------------------------------------------------------------------------|----------------------------------|
|    |             | after artificial inoculation of<br>soybean cv. Kasatka |                                  |             | after artificial inoculation<br>of common bean cv.<br>Purpurnaya Koroleva |                                  |
| 1  | C043        | 0                                                      | a                                | C043        | 0                                                                         | a                                |
| 2  | C115        | 0                                                      | a                                | C115        | 0                                                                         | a                                |
| 3  | C118        | 0                                                      | a                                | C118        | 0                                                                         | a                                |
| 4  | C137        | 0                                                      | a                                | C137        | 0                                                                         | a                                |
| 5  | C091        | 0,87                                                   | b                                | C090        | 0,77                                                                      | b                                |
| 6  | C133        | 0,88                                                   | b                                | C119        | 0,92                                                                      | bc                               |
| 7  | C119        | 1,11                                                   | b                                | C108        | 0,93                                                                      | bc                               |
| 8  | C116        | 1,76                                                   | de                               | C039        | 0,96                                                                      | bc                               |
| 9  | C039        | 1,77                                                   | de                               | C133        | 1,05                                                                      | bc                               |
| 10 | C121        | 1,77                                                   | de                               | C038        | 1,06                                                                      | bc                               |
| 11 | C034        | 1,81                                                   | dec                              | C091        | 1,06                                                                      | bc                               |
| 12 | C108        | 1,99                                                   | efg                              | C116        | 1,08                                                                      | bc                               |
| 13 | C038        | 2,02                                                   | efg                              | C087        | 1,09                                                                      | bc                               |
| 14 | C106        | 2,06                                                   | fg                               | C121        | 1,17                                                                      | bc                               |
| 15 | C110        | 2,11                                                   | g                                | C112        | 2,04                                                                      | def                              |
| 16 | C138        | 2,72                                                   | h                                | C037        | 2,14                                                                      | ef                               |
| 17 | C130        | 2,83                                                   | h                                | C106        | 2,16                                                                      | ef                               |
| 18 | C122        | 2,85                                                   | h                                | C001        | 2,17                                                                      | ef                               |
| 19 | C129        | 2,89                                                   | h                                | C113        | 2,2                                                                       | efg                              |
| 20 | C109        | 2,94                                                   | h                                | C109        | 2,48                                                                      | fgh                              |
| 21 | C035        | 3,65                                                   | i                                | C120        | 2,83                                                                      | hi                               |
| 22 | C001        | 3,74                                                   | i                                | C114        | 2,89                                                                      | hij                              |
| 23 | C037        | 3,74                                                   | i                                | C035        | 2,91                                                                      | hij                              |

| №  | Strain name | Average values<br>of the leaf<br>lesion area           | Groups by<br>criterion<br>Duncan | Strain name | Average<br>values of the<br>leaf lesion<br>area                           | Groups by<br>criterion<br>Duncan |
|----|-------------|--------------------------------------------------------|----------------------------------|-------------|---------------------------------------------------------------------------|----------------------------------|
|    |             | after artificial inoculation of<br>soybean cv. Kasatka |                                  |             | after artificial inoculation<br>of common bean cv.<br>Purpurnaya Koroleva |                                  |
| 24 | C144        | 3,81                                                   | i                                | C110        | 2,91                                                                      | hij                              |
| 25 | C139        | 3,82                                                   | i                                | C138        | 3,3                                                                       | jk                               |
| 26 | C036        | 4,63                                                   | j                                | C036        | 3,49                                                                      | kl                               |
| 27 | C040        | 4,66                                                   | j                                | C040        | 3,54                                                                      | klm                              |
| 28 | C114        | 4,74                                                   | j                                | C129        | 3,76                                                                      | lmn                              |
| 29 | C120        | 4,74                                                   | j                                | C144        | 3,76                                                                      | lmn                              |
| 30 | C123        | 4,78                                                   | j                                | C139        | 3,85                                                                      | lmn                              |
| 31 | C087        | 4,8                                                    | j                                | C123        | 3,96                                                                      | mn                               |
| 32 | C117        | 4,82                                                   | j                                | C122        | 3,97                                                                      | mn                               |
| 33 | C086        | 4,87                                                   | j                                | C117        | 4                                                                         | n                                |
| 34 | C112        | 4,87                                                   | j                                | C034        | 4,06                                                                      | n                                |
| 35 | C113        | 4,93                                                   | j                                | C130        | 4,18                                                                      | n                                |
| 36 | C090        | 5,5                                                    | k                                | C142        | 4,82                                                                      | o                                |
| 37 | C089        | 6,45                                                   | k                                | C088        | 5,24                                                                      | d                                |
| 38 | C142        | 6,84                                                   | l                                | C086        | 5,5                                                                       | p                                |
| 39 | C088        | 7,07                                                   | l                                | C089        | 6,78                                                                      | q                                |
