# Supplementary material for: Phytopathogenic Curtobacterium flaccumfaciens Strains Circulating on Leguminous Plants, Alternative Hosts and Weeds in Russia
Source: MDPI journal article supplement (doi:10.3390/plants13050667), 2024-02-28
Supplement: s1 [file s1]

## Supplementary Material

### Phytopathogenic *Curtobacterium flaccumfaciens* strains circulating on leguminous plants, alternative hosts and weeds in Russia

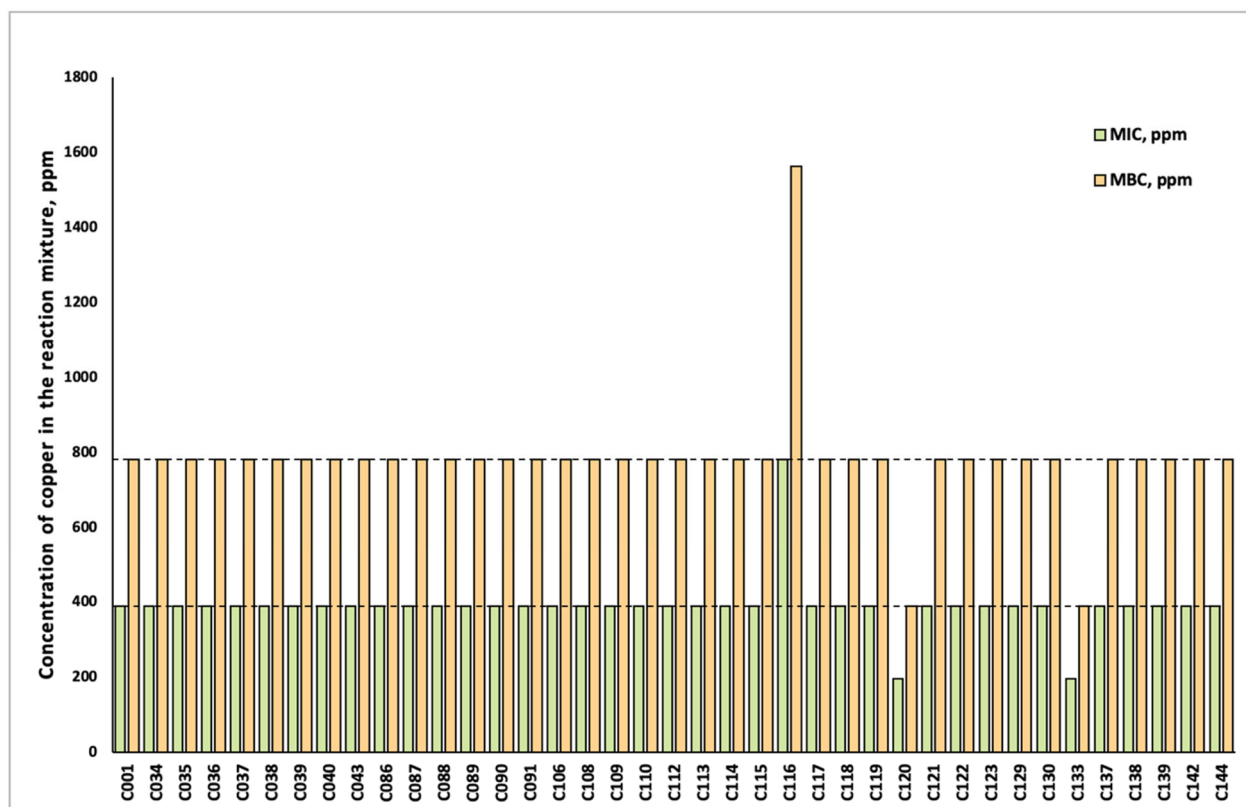

**Figure S1.** MIC and MBC values for copper dihydroxide against strains of *Curtobacterium flaccumfaciens* measured by the liquid dilution method YD. The values in the boxes represent the respective mean value of four independent experiments. Dashed dividing lines separate susceptible (lower lines) and resistant (upper lines) Cf strains.
